# Supplementary material for: Vitamin K2 protects mice against non-alcoholic fatty liver disease induced by high-fat diet
Source: Springer Nature journal article supplement (doi:10.1038/s41598-024-53644-6), 2024-02-06
Supplement: MOESM1 [file 41598_2024_53644_MOESM1_ESM.pdf]

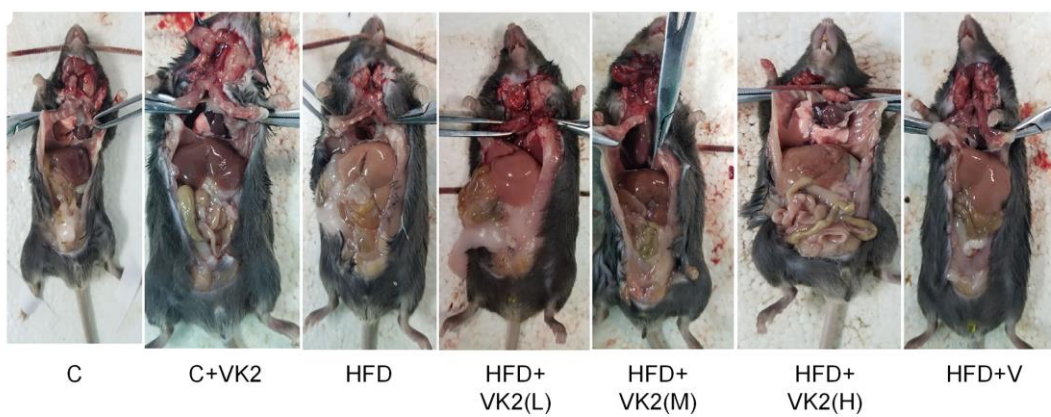

### Supplementary Figure S1

The gross view of liver
